# Supplementary material for: Computational Identification of Genomic Features That Influence 3D Chromatin Domain Formation
Source: PubMed Central journal article supplement (PMC4874696; doi:10.1371/journal.pcbi.1004908), 2016-05-20
Supplement: pcbi.1004908.s001.pdf [file pcbi.1004908.s001.pdf]

| Model                                  | Statistical Interactions | Deviance Ratio          |                   | Akaike Information Criterion |                   |
|----------------------------------------|--------------------------|-------------------------|-------------------|------------------------------|-------------------|
|                                        |                          | Genomic Coordinate Data | Quantitative Data | Genomic Coordinate Data      | Quantitative Data |
| Insulator binding proteins             | No                       | 0.100                   | 0.068             | 152806                       | 158402            |
| Cofactors                              | No                       | 0.120                   | 0.073             | 149399                       | 157517            |
| Insulator binding proteins + Cofactors | No                       | 0.126                   | 0.089             | 148499                       | 154722            |
| Insulator binding proteins + Cofactors | Yes                      | 0.135                   | 0.108             | 146918                       | 151605            |
| Functional elements                    | No                       | 0.073                   | NA                | 157521                       | NA                |
