# Supplementary material for: Computational Identification of Genomic Features That Influence 3D Chromatin Domain Formation
Source: PubMed Central journal article supplement (PMC4874696; doi:10.1371/journal.pcbi.1004908), 2016-05-20
Supplement: pcbi.1004908.s002.pdf [file pcbi.1004908.s002.pdf]

| Protein             | Beta  | Standard Error | z value | P-value               |
|---------------------|-------|----------------|---------|-----------------------|
| BEAF-32             | 2.01  | 0.05           | 42.83   | $< 1 \times 10^{-20}$ |
| dCTCF               | 0.24  | 0.09           | 2.69    | 0.009                 |
| dTFIIIC             | 0.41  | 0.10           | 4.28    | $3 \times 10^{-5}$    |
| GAF                 | 0.86  | 0.15           | 5.64    | $3 \times 10^{-7}$    |
| Su(Hw)              | -0.69 | 0.09           | -7.59   | $4 \times 10^{-16}$   |
| Barren              | -0.04 | 0.05           | -0.79   | 0.42                  |
| Cap-H2              | 1.14  | 0.05           | 21.22   | $< 1 \times 10^{-20}$ |
| Chromator           | 0.32  | 0.07           | 4.63    | $4 \times 10^{-6}$    |
| CP190               | 1.13  | 0.05           | 22.25   | $< 1 \times 10^{-20}$ |
| Fs(1)h-L            | 0.86  | 0.05           | 18.45   | $< 1 \times 10^{-20}$ |
| Rad21               | 0.83  | 0.03           | 26.11   | $< 1 \times 10^{-20}$ |
| BEAF-32 x Barren    | 0.27  | 0.06           | 4.23    | $2 \times 10^{-5}$    |
| dCTCF x Barren      | 0.23  | 0.07           | 3.04    | 0.002                 |
| dTFIIIC x Barren    | -0.34 | 0.07           | -4.77   | $2 \times 10^{-6}$    |
| GAF x Barren        | -0.47 | 0.10           | -4.73   | $2 \times 10^{-6}$    |
| Su(Hw) x Barren     | -0.19 | 0.07           | -2.63   | 0.008                 |
| BEAF-32 x Cap-H2    | -0.55 | 0.06           | -8.85   | $< 1 \times 10^{-20}$ |
| dCTCF x Cap-H2      | -0.42 | 0.07           | -6.19   | $6 \times 10^{-10}$   |
| dTFIIIC x Cap-H2    | 0.11  | 0.07           | 1.70    | 0.09                  |
| GAF x Cap-H2        | -0.38 | 0.12           | -3.26   | 0.001                 |
| Su(Hw) x Cap-H2     | 0.07  | 0.08           | 0.86    | 0.38                  |
| BEAF-32 x Chromator | -0.37 | 0.07           | -5.20   | $2 \times 10^{-7}$    |
| dCTCF x Chromator   | 0.07  | 0.07           | 1.04    | 0.3                   |
| dTFIIIC x Chromator | 0.15  | 0.07           | 2.12    | 0.03                  |
| GAF x Chromator     | 0.36  | 0.12           | 2.93    | 0.004                 |
| Su(Hw) x Chromator  | 0.29  | 0.08           | 3.62    | $3 \times 10^{-4}$    |
| BEAF-32 x CP190     | -0.80 | 0.07           | -12.25  | $< 1 \times 10^{-20}$ |
| dCTCF x CP190       | 0.16  | 0.09           | 1.75    | 0.08                  |
| dTFIIIC x CP190     | -0.14 | 0.08           | -1.72   | 0.08                  |
| GAF x CP190         | -0.08 | 0.11           | -0.76   | 0.45                  |
| Su(Hw) x CP190      | -0.03 | 0.09           | -0.36   | 0.72                  |
| BEAF-32 x Fs(1)h-L  | -0.70 | 0.06           | -11.83  | $< 1 \times 10^{-20}$ |
| dCTCF x Fs(1)h-L    | -0.11 | 0.07           | -1.63   | 0.10                  |
| dTFIIIC x Fs(1)h-L  | 0.21  | 0.06           | 3.28    | $9 \times 10^{-4}$    |
| GAF x Fs(1)h-L      | -0.04 | 0.10           | -0.40   | 0.69                  |
| Su(Hw) x Fs(1)h-L   | -0.19 | 0.07           | -2.74   | 0.006                 |
| BEAF-32 x Rad21     | -0.46 | 0.06           | -7.75   | $1 \times 10^{-14}$   |
| dCTCF x Rad21       | -0.23 | 0.07           | -3.08   | 0.002                 |
| dTFIIIC x Rad21     | -0.12 | 0.09           | -1.39   | 0.17                  |
| GAF x Rad21         | -0.20 | 0.16           | -1.27   | 0.21                  |
| Su(Hw) x Rad21      | 0.44  | 0.09           | 5.06    | $3 \times 10^{-7}$    |
