# Supplementary material for: Computational Identification of Genomic Features That Influence 3D Chromatin Domain Formation
Source: PubMed Central journal article supplement (PMC4874696; doi:10.1371/journal.pcbi.1004908), 2016-05-20
Supplement: pcbi.1004908.s003.pdf [file pcbi.1004908.s003.pdf]

| Protein | Beta   | Standard Error | z value | P-value                 |
|---------|--------|----------------|---------|-------------------------|
| RAD21   | 1.905  | 0.132          | 14.382  | < 1 x 10 <sup>-20</sup> |
| CTCF    | 1.900  | 0.061          | 30.996  | < 1 x 10 <sup>-20</sup> |
| ZNF143  | 1.853  | 0.087          | 21.293  | < 1 x 10 <sup>-19</sup> |
| EZH2    | 1.319  | 0.200          | 6.596   | 4 x 10 <sup>-11</sup>   |
| BRCA1   | 1.129  | 0.441          | 2.563   | 0.010                   |
| YY1     | 0.983  | 0.065          | 15.071  | < 1 x 10 <sup>-20</sup> |
| ZZZ3    | 0.910  | 0.329          | 2.767   | 0.006                   |
| ZNF384  | 0.905  | 0.041          | 22.190  | < 1 x 10 <sup>-20</sup> |
| RUNX3   | 0.790  | 0.052          | 15.227  | < 1 x 10 <sup>-19</sup> |
| BATF    | 0.708  | 0.111          | 6.359   | 2 x 10 <sup>-10</sup>   |
| EBF1    | 0.698  | 0.080          | 8.760   | 2 x 10 <sup>-18</sup>   |
| SIN3A   | 0.612  | 0.063          | 9.670   | < 1 x 10 <sup>-20</sup> |
| NFE2    | 0.604  | 0.421          | 1.435   | 0.151                   |
| MXI1    | 0.582  | 0.072          | 8.113   | 5 x 10 <sup>-16</sup>   |
| EGR1    | 0.574  | 0.122          | 4.717   | 2 x 10 <sup>-6</sup>    |
| NFYB    | 0.571  | 0.085          | 6.692   | 2 x 10 <sup>-11</sup>   |
| USF1    | 0.533  | 0.155          | 3.448   | 6 x 10 <sup>-4</sup>    |
| ELF1    | 0.518  | 0.077          | 6.758   | 2 x 10 <sup>-11</sup>   |
| NRF1    | 0.510  | 0.164          | 3.117   | 0.002                   |
| CHD1    | 0.504  | 0.086          | 5.885   | 2 x 10 <sup>-9</sup>    |
| Kaiso   | 0.433  | 0.262          | 1.655   | 0.098                   |
| NFYA    | 0.410  | 0.272          | 1.504   | 0.133                   |
| PAX5    | 0.402  | 0.096          | 4.203   | 3 x 10 <sup>-5</sup>    |
| SRF     | 0.371  | 0.164          | 2.256   | 0.024                   |
| PBX3    | 0.353  | 0.155          | 2.282   | 0.022                   |
| TAF1    | 0.264  | 0.102          | 2.594   | 0.009                   |
| MAZ     | 0.234  | 0.065          | 3.604   | 3 x 10 <sup>-4</sup>    |
| MAFK    | 0.234  | 0.097          | 2.400   | 0.016                   |
| STAT1   | 0.234  | 0.157          | 1.490   | 0.136                   |
| ZEB1    | 0.224  | 0.136          | 1.651   | 0.099                   |
| FOXM1   | 0.221  | 0.056          | 3.956   | 8 x 10 <sup>-5</sup>    |
| BCL3    | 0.219  | 0.094          | 2.317   | 0.020                   |
| USF2    | 0.201  | 0.147          | 1.370   | 0.171                   |
| POU2F2  | 0.172  | 0.079          | 2.174   | 0.030                   |
| ATF3    | 0.150  | 0.418          | 0.360   | 0.719                   |
| NFATC1  | 0.145  | 0.063          | 2.319   | 0.020                   |
| FOS     | 0.076  | 0.322          | 0.236   | 0.814                   |
| MYC     | 0.054  | 0.081          | 0.668   | 0.504                   |
| MTA3    | 0.049  | 0.059          | 0.841   | 0.400                   |
| JUND    | 0.042  | 0.225          | 0.186   | 0.853                   |
| ATF2    | 0.025  | 0.062          | 0.408   | 0.683                   |
| PIGG    | 0.022  | 0.084          | 0.258   | 0.796                   |
| STAT5A  | 0.019  | 0.073          | 0.259   | 0.796                   |
| NFIC    | 0.002  | 0.051          | 0.043   | 0.966                   |
| TCF12   | -0.036 | 0.115          | -0.313  | 0.754                   |
| PML     | -0.050 | 0.051          | -0.963  | 0.336                   |
| IKZF1   | -0.122 | 0.066          | -1.859  | 0.063                   |
| STAT3   | -0.139 | 0.107          | -1.307  | 0.191                   |
| IRF4    | -0.141 | 0.099          | -1.418  | 0.156                   |
| TCF3    | -0.172 | 0.108          | -1.597  | 0.110                   |
| MAX     | -0.201 | 0.081          | -2.466  | 0.014                   |
| CEBPB   | -0.202 | 0.100          | -2.019  | 0.044                   |
| IRF3    | -0.222 | 0.113          | -1.956  | 0.051                   |
| E2F4    | -0.247 | 0.161          | -1.532  | 0.126                   |
| MEF2C   | -0.254 | 0.146          | -1.737  | 0.082                   |
| MEF2A   | -0.261 | 0.120          | -2.180  | 0.029                   |
| RFX5    | -0.309 | 0.151          | -2.049  | 0.041                   |
| BCLAF1  | -0.318 | 0.102          | -3.115  | 0.002                   |
| SP1     | -0.337 | 0.104          | -3.244  | 0.001                   |
| CHD2    | -0.347 | 0.090          | -3.847  | 1 x 10 <sup>-4</sup>    |
| BHLHE40 | -0.407 | 0.101          | -4.021  | 6 x 10 <sup>-5</sup>    |
| SIX5    | -0.429 | 0.207          | -2.069  | 0.039                   |
| ETS1    | -0.561 | 0.231          | -2.432  | 0.015                   |
| REST    | -0.596 | 0.179          | -3.331  | 9 x 10 <sup>-4</sup>    |
| ELK1    | -0.739 | 0.126          | -5.885  | 4 x 10 <sup>-9</sup>    |
| BCL11A  | -0.816 | 0.134          | -6.088  | 1 x 10 <sup>-9</sup>    |
| P300    | -1.220 | 0.192          | -6.345  | 2 x 10 <sup>-10</sup>   |
| RXRA    | -1.365 | 0.381          | -3.579  | 3 x 10 <sup>-4</sup>    |
| ZNF274  | -2.592 | 1.066          | -2.432  | 0.015                   |
