# Supplementary material for: Computational Identification of Genomic Features That Influence 3D Chromatin Domain Formation
Source: PubMed Central journal article supplement (PMC4874696; doi:10.1371/journal.pcbi.1004908), 2016-05-20

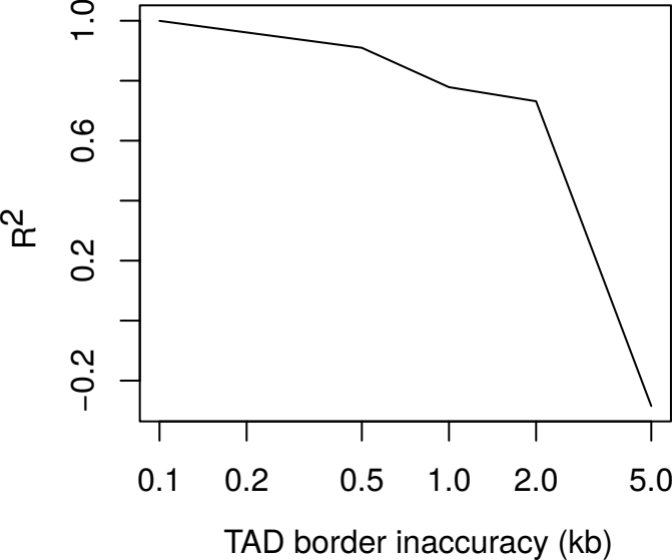

Supplement: pcbi.1004908.s006.pdf [file pcbi.1004908.s006.pdf]
